# Supplementary material
Source: MDPI journal article supplement (https://www.mdpi.com/2073-445X/11/12/2281)
Supplement: s1 [file s1 › land-2060788-supplementary.pdf]

**Table S1** Details of satellite data used for Land use land cover map synthesis.

| Satellite           | Date of acquisition |               |
|---------------------|---------------------|---------------|
|                     | Dharamsala          | Pithoragarh   |
| ASTER (15 m)        | 19 April 2002       | 20 April 2001 |
|                     | 17 March 2010       | 07 April 2008 |
| Sentinel 2-a (10 m) | 28 April 2016       | 22 April 2016 |
|                     | 03 April 2019       | 29 April 2019 |

**Table S2** LULC classes used in current study. Note: Here the classes with an asterisk (\*) are of both Pithoragarh and Dharamsala, except waterbody.

| LULC category | Description                                                                                                                                                                                                                     |
|---------------|---------------------------------------------------------------------------------------------------------------------------------------------------------------------------------------------------------------------------------|
| Deodar        | Forest type dominated by <i>Cedrus deodara</i>                                                                                                                                                                                  |
| Oak*          | Forest type dominated by <i>Quercus</i> spp                                                                                                                                                                                     |
| Pine*         | Forest type dominated by <i>Pinus Roxburghii</i>                                                                                                                                                                                |
| Oak mixed     | Mixed forest type with <i>Quercus</i> spp and high altitude morinda spruce ( <i>Picea smithiana</i> )                                                                                                                           |
| Pine mixed    | Mixed forest type with <i>Pinus Roxburghii</i> and <i>Quercus</i> spp                                                                                                                                                           |
| Mixed forest  | Mixed forest type with local deciduous vegetation including <i>Prunus</i> spp. (pajja), <i>Bauhinia variegata</i> (kachnar), duri along with patches of tea gardens and exotic <i>Grevillea robusta</i> (Himalayan silver oak). |
| Vegetation*   | Sparse/low density trees within and around urban and agricultural regions                                                                                                                                                       |
| Waterbody*    | Pithoragarh lake and streams<br>Dharamsala higher altitude region covered by glaciers                                                                                                                                           |
| Barren land*  | Barren lands including non-vegetated exposed rocks, unused and unmanaged regions sandy areas that are un-irrigated lands within and around urban region.                                                                        |
| Cropland*     | Currently cultivated agricultural land                                                                                                                                                                                          |
| Fallow*       | Currently non-cultivated agricultural land                                                                                                                                                                                      |
| Open area*    | Open areas that are un-irrigated lands within and around urban region.                                                                                                                                                          |
| Built up*     | Residential, commercial, industrial, artificial or road infrastructures                                                                                                                                                         |

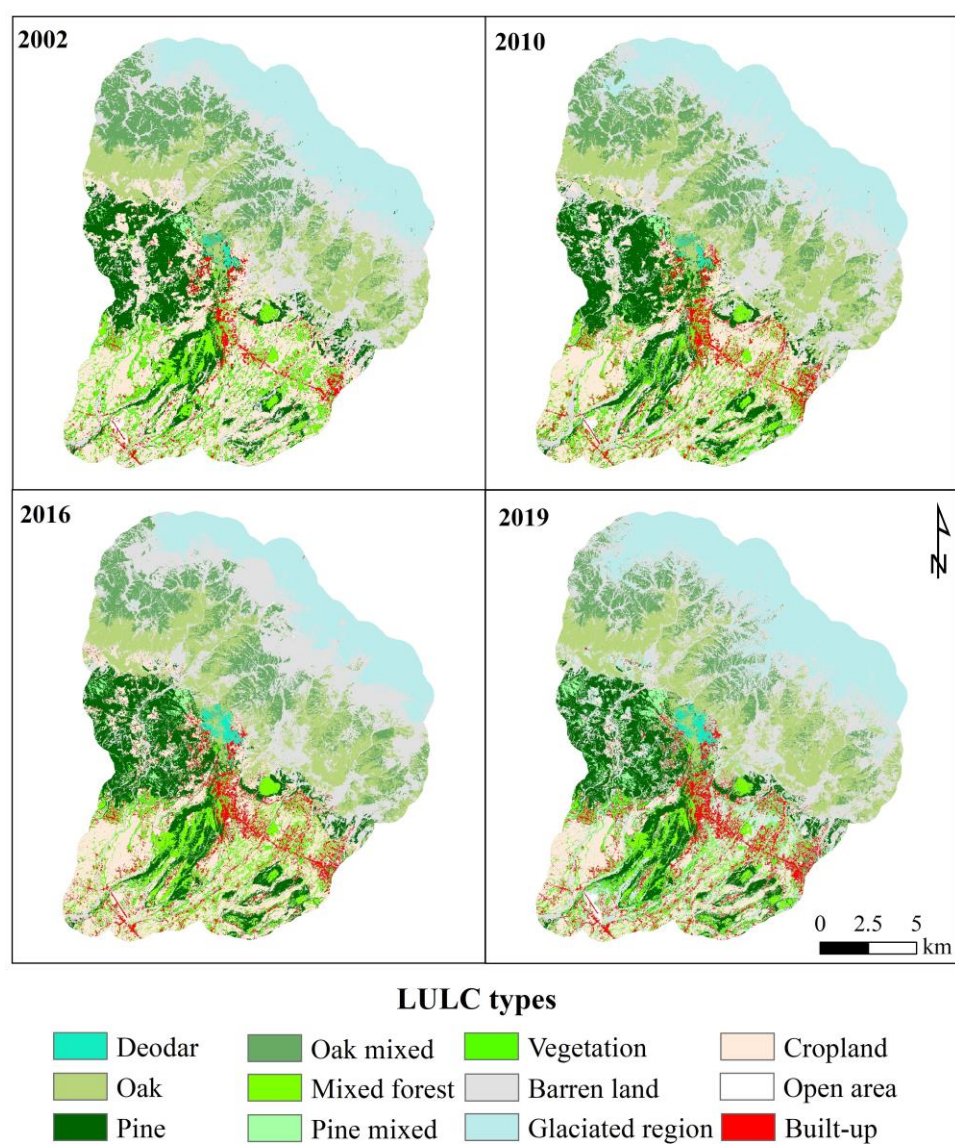

**Figure S1** Land use land cover changes in Dharamsala during years 2002, 2010, 2016 and 2019.

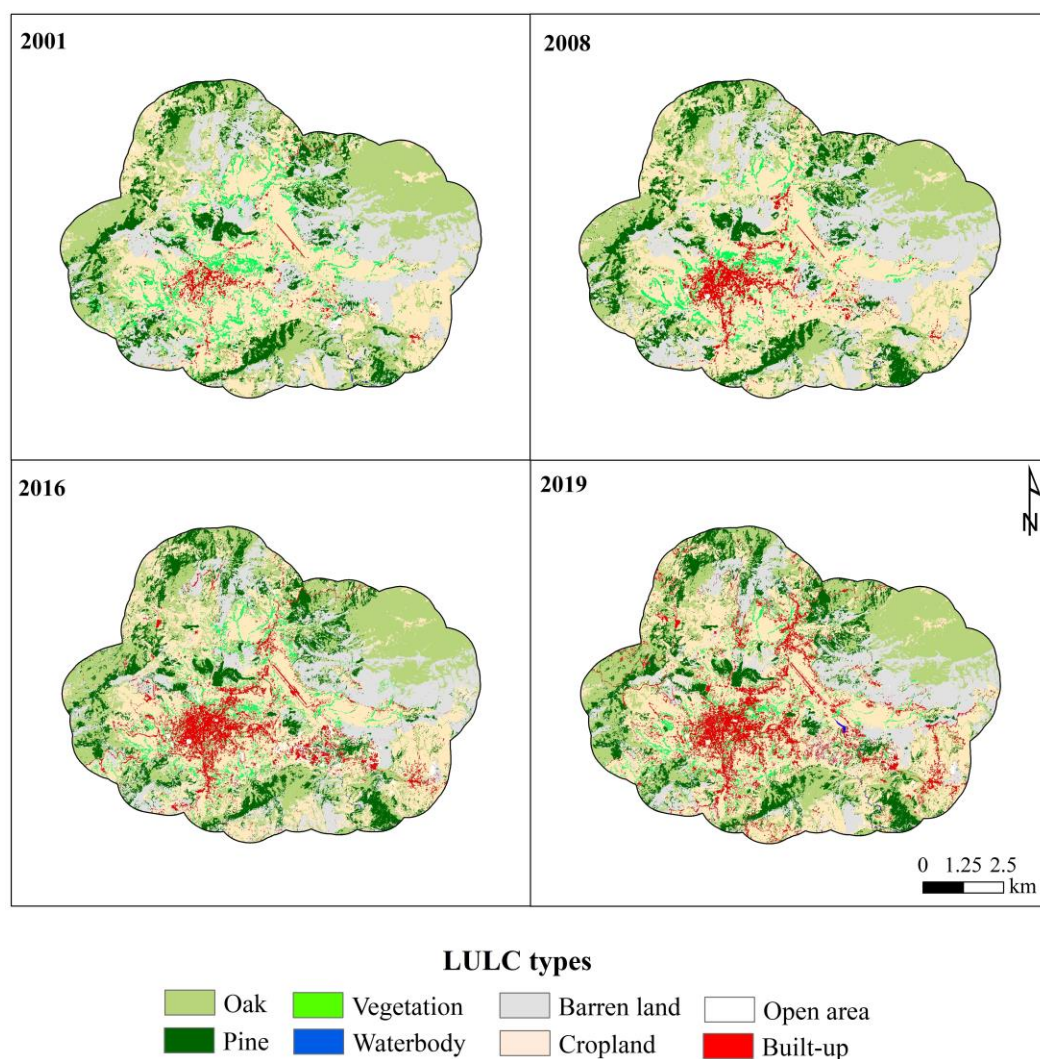

**Figure S2** Land use land cover changes in Pithoragarh during years 2001, 2008, 2016 and 2019.

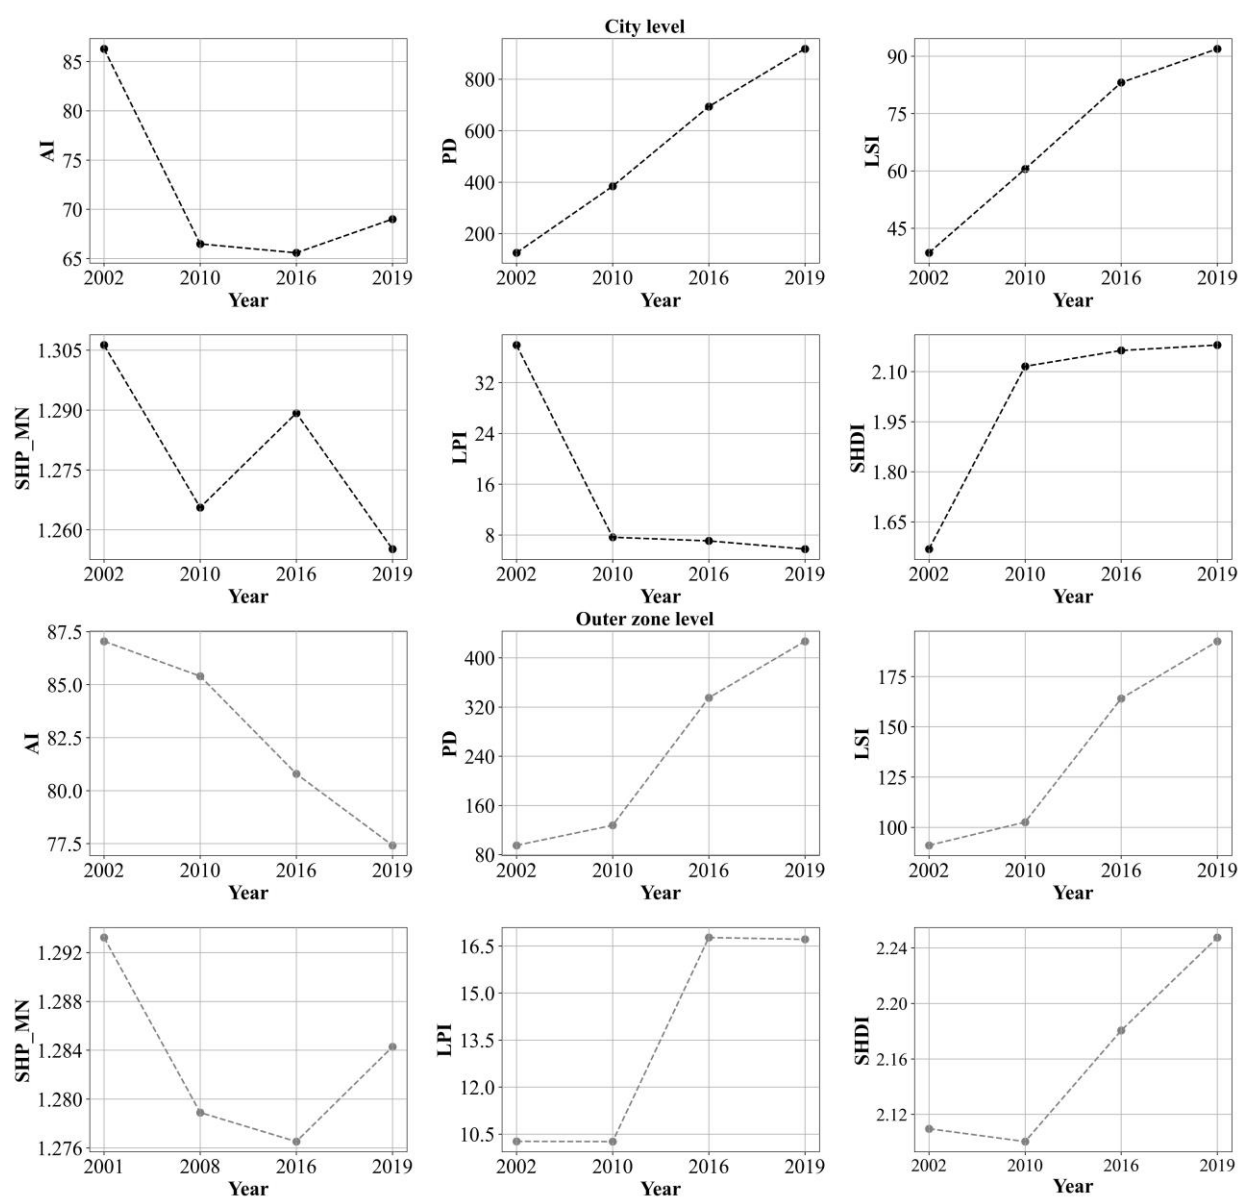

Figure S3 Temporal series of landscape metrics of Dharamsala quantified at landscape level.

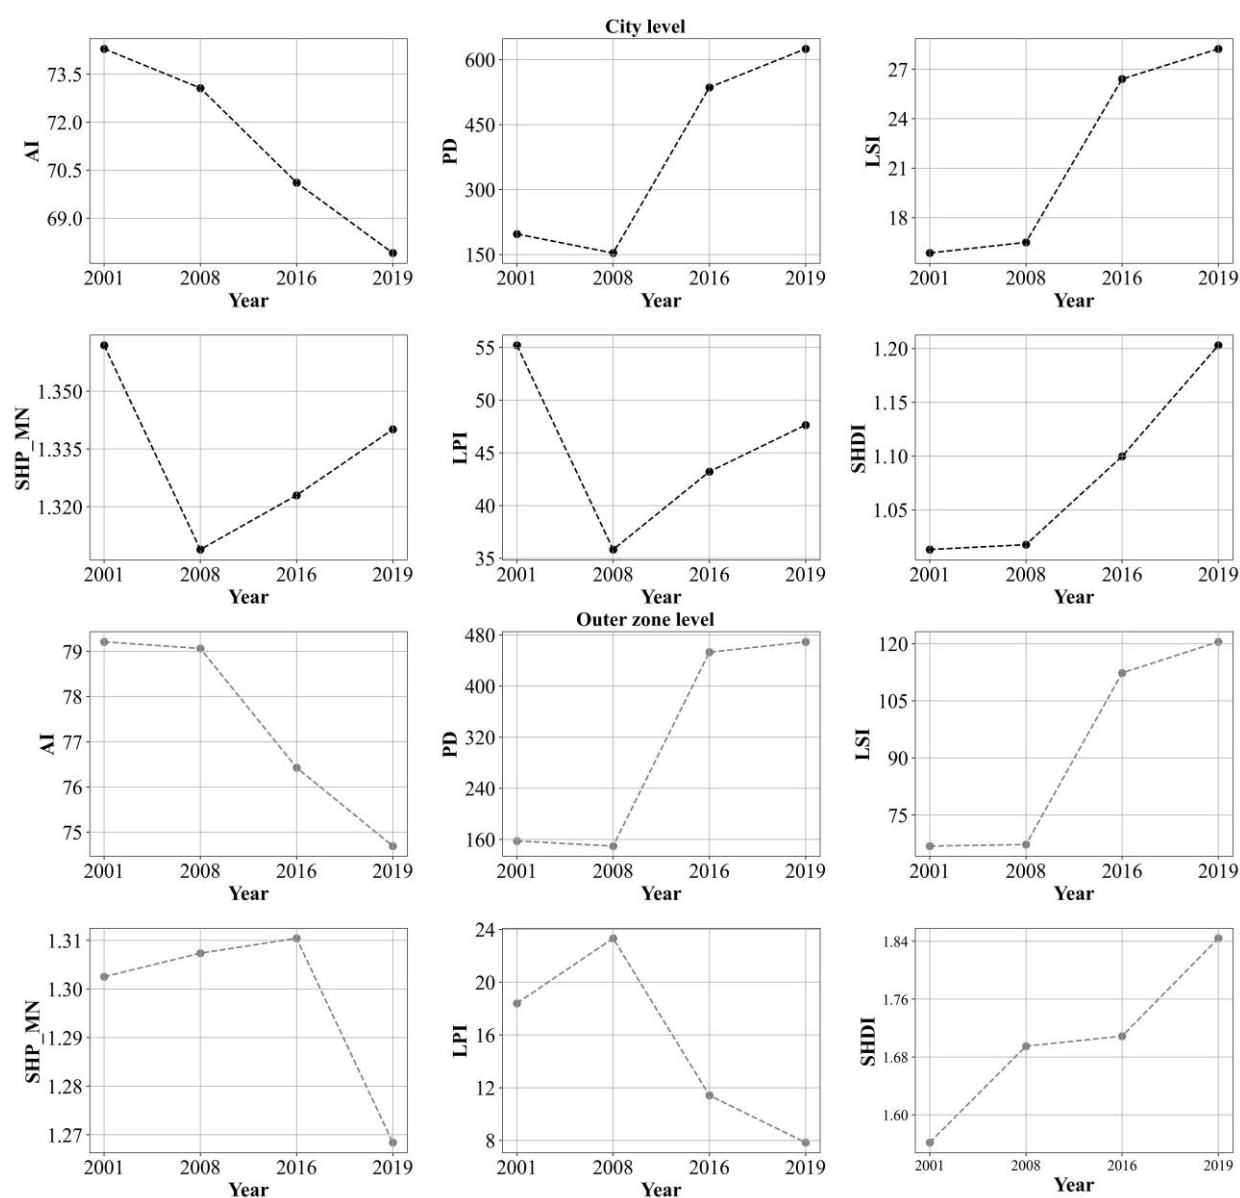

Figure S4 Temporal series of landscape metrics of Pithoragarh quantified at landscape level.
